# 1                    **Quantitative morphological variation in the developing *Drosophila* wing**

2

3

4 Matamoro-Vidal Alexis <sup>1,2,\*,#</sup>, Huang Yunxian <sup>3</sup>, Salazar-Ciudad Isaac <sup>2,3</sup>, Shimmi Osamu <sup>3</sup>,  
5 and Houle David <sup>1,\*</sup>

6

7 <sup>1</sup>Department of Biological Science, Florida State University, Tallahassee, Florida, United  
8 States 32306.

9 <sup>2</sup>Genomics, Bioinformatics and Evolution Group. Department de Genètica i Microbiologia,  
10 Universitat Autònoma de Barcelona, Cerdanyola del Vallès 08193, Spain.

11 <sup>3</sup>Center of Excellence in Experimental and Computational Developmental Biology.  
12 Developmental Biology Program, Institute of Biotechnology, University of Helsinki, PO Box  
13 56, FIN-00014 Helsinki, Finland.

14

15 \*Corresponding authors.

16 # Present address: Institut Jacques Monod. UMR7592 CNRS / Université Paris 7. 15 rue  
17 Hélène Brion. 75013 Paris.

18

19 **Authors contributions:** Designed research: AMV, OS, ISC and DH, Performed experiments:  
20 HY, OS and AMV. Analysed the data: DH and AMV. Wrote the manuscript: AMV and DH.  
21 with inputs from all the other authors.

22

23

1 **Abstract**

2 Quantitative variation in morphology is pervasive in all species and is the basis for the  
3 evolution of differences among species. The developmental causes of such variation are a  
4 relatively neglected research topic. Quantitative comparisons of variation arising at different  
5 developmental stages with the variation in the final structure enable us to determine when  
6 variation arises, and to generate hypotheses about the causes of that variation. We measured  
7 shape and size variation in the wing of *Drosophila melanogaster* at three developmental  
8 stages: late third instar, post-pupariation and in the adult fly. Flies of a wild-type and two  
9 mutants (*shf* and *ds*) with effects on the adult wing shape and size were studied. Despite  
10 experimental noise related to the difficulty of comparing developing structures, we found  
11 consistent differences in wing shape and size at each developmental stage between  
12 genotypes. In addition we provide linear rules allowing to link late disc morphology with  
13 early wings. Our approach provides a framework to analyze quantitative morphological  
14 variation in the developing fly wing. This framework should help to characterize the natural  
15 variation of the larval and pupal wing shape, and to measure the contribution of the processes  
16 occurring during these developmental stages to the natural variation in adult wing  
17 morphology.

18

19 **Running title:** Quantitative development of the wing

20 **Key-words:** *dachsous*; Geometric Morphometrics; Organ shape; *shifted*; Wing  
21 morphogenesis.

22

## 1 **Introduction**

2 The investigation of the developmental origins of morphological variation has become an  
3 important research area in evolutionary biology (Mallarino & Abzhanov, 2012). The  
4 complexity of developmental processes has made this investigation challenging, especially  
5 for morphological traits exhibiting multivariate and quantitative variation (Parsons &  
6 Albertson, 2013), or subtle variation at the population level (Nunes et al., 2013). While major  
7 advances have been made in finding the developmental causation of natural variation for  
8 gross morphological characteristics like the presence or absence of a structure (e.g., Arnoult  
9 et al., 2013; Chan et al., 2010), there are very few studies reporting such findings for traits  
10 exhibiting subtle and quantitative variation (Mallarino et al., 2012; Nijhout et al., 2014;  
11 Salazar-Ciudad & Jernvall, 2010).

12 Addressing the question of how changes in development result in quantitative  
13 variation of morphology requires quantitative comparisons of the morphology of the  
14 developing structures between individuals and between developmental stages (including the  
15 adult stage). These comparisons enable us to identify the developmental stage at which  
16 morphological variation first appears, and perhaps the developmental mechanism involved.

17 The wing of the fruit fly *Drosophila* is a popular model system for development and  
18 evolution. There is extensive knowledge on the variation of the adult wing shape at the intra  
19 and inter-specific levels (Houle et al., 2017). The developmental processes involved in wing  
20 shape determination are relatively well known (Diaz de la Loza & Thompson, 2016;  
21 Matamoro-Vidal et al., 2015). The fly wing goes through three main developmental stages.  
22 First, in the larval stages, the wing tissue is a mono-layered epithelium of cells, the wing  
23 imaginal disc, which undergo extensive cell division and tissue patterning. During this  
24 period, the number of cells goes from ~ 50 to ~50.000, and the major compartments of the  
25 wing (ventral, dorsal, anterior, posterior, proximal, distal) are defined. In addition, the tissue  
26 is divided into four intervein regions, separated from each other by the proveins domains  
27 which are groups of cells expressing a specific set of genes and that are the precursors of the

1 adult wing veins L2 to L5 (Fig. 1a). Second, during metamorphosis, the wing imaginal disc is  
2 folded such that the dorsal and ventral compartments, which were on the same plane, are now  
3 apposed on each other ending up on different planes (Fig. 1b). In addition, the tissue expands  
4 in the proximo-distal axis giving the tissue a wing-like morphology (Fig. 1c). Third, during  
5 the late pupal period, a force oriented in the proximo-distal axis produced by the contraction  
6 of the hinge further elongates the tissue (Fig. 1d-e).

7       Variation in these morphogenetic events must be the source of the natural variation of  
8 the adult wing shape but the contribution of each of them is unknown. For example, the wing  
9 disc is the subject of much research in developmental biology but so far natural variation in  
10 the shape of the wing disc has not been characterized, and how changes in the shape of this  
11 structure could result in changes in the adult wing has never been investigated in a  
12 quantitative way. In this work we provide the first quantitative measurements of the  
13 developmental transformation of the late larval wing imaginal disc to the early pupal and  
14 adult wing shapes in *Drosophila melanogaster*. We compare shape variation for wing  
15 imaginal discs and early pupal wings between sexes and between three genotypes differing  
16 by mutations in two loci (*dachsous* and *shifted*) known to regulate aspects of wing  
17 development involved in the determination of adult wing shape.



## 1 **Methods**

2

### 3 ***Drosophila stocks.***

4           The number of wings examined for each condition is given on Table 1. The *yw* flies  
5 were used as wild-type. In order to compare *yw* wings with narrower wings, we studied flies  
6 homozygous for the *shf<sup>2</sup>* allele (Bloomington # 112), in which the spacing between the third  
7 and fourth longitudinal vein is greatly reduced (Glise et al., 2005; Gorfinkiel et al.,  
8 2005) (Figure 2). We also studied mutants of the *dachsous* (*ds*) gene, which have round  
9 wings with increased spacing between third and fourth longitudinal veins (Clark et al.,  
10 1995) (Figure 2). We used transheterozygous individuals for the alleles *ds<sup>1</sup>* (Bloomington #  
11 285) and *ds<sup>05142</sup>* (Bloomington # 11394). A transheterozygous genotype was chosen because  
12 flies homozygous for alleles of *ds* have high lethality and severe wing overgrowth making  
13 quantitative wing shape measurements challenging. *ds<sup>1</sup>* and *ds<sup>05142</sup>* lines were balanced over  
14 the Cyo, Dfd-YFP balancer chromosome and crossed with each other. *ds<sup>1</sup>/ds<sup>05142</sup>* flies were  
15 thus identified by lack of YFP.

16

### 17 ***Dissections.***

18 Larval wing discs were dissected from wandering third instar larvae. The wing discs were  
19 fixed with 4% Formaldehyde fixative at room temperature for 20mins, then dissected from  
20 the larva.

21 Pupal wings were dissected from pupae aged from the white prepupal stage. White  
22 prepupae were defined as individuals that had ceased movement, everted anterior spiracles,  
23 but had not yet begun tanning of cuticle. Individual white prepupae were picked and reared at  
24 25°C until dissection. The pupal wings were fixed with 4% Formaldehyde fixative at 5 h  
25 after pupariation, left at 4 °C overnight, and then dissected from the pupae.

26           Adult wings were dissected from adult flies and mounted with 80% glycerol.

1

## 2 ***Immunostaining.***

3 We used immunological stains to identify the positions of proveins in larval wing discs and  
4 pupal wings. Immunostaining was performed as previously described (Matsuda et al 2013).

5 The primary antibodies used were mouse anti-Delta at 1:50 (Developmental Studies  
6 Hybridoma Bank (DSHB), rat anti-cubitus at 1:50 (DSHB). The secondary antibodies were  
7 as follows: goat anti-mouse IgG-Alexa 568 and goat anti-rat IgG-Alexa 488 were used at  
8 1:200, respectively (Invitrogen).

9

## 10 ***Imaging.***

11 The fluorescent images were obtained with Zeiss LSM700 confocal microscope. Adult wing  
12 images were obtained with Nikon eclipse 90i.

13

## 14 ***Landmarks and semi-landmarks.***

15 Size and shape of 3<sup>rd</sup> instar wing discs, 5 h pupal wings, and adult wings were measured by  
16 gathering a set of 8 landmarks and 9 semi-landmarks on each specimen (Figure 3), using  
17 *tpsUtil* and *tpsDig2* software (<http://life.bio.sunysb.edu/morph>) for the discs and pupal wings;  
18 and using *Wings4* (Houle et al., 2003; <http://bio.fsu.edu/~dhoule/wings.html>) for the adult  
19 wings.

20 The positions of the landmarks were defined using molecular and morphological  
21 markers (Figure 3). For the former, we used immunostaining showing the Cubitus interruptus  
22 (Ci) and Delta (DI) territories in wing discs and 5h pupal wings. The gene *ci* is expressed in  
23 all the anterior wing whereas *dl* is expressed in two stripes of cells following the dorso-  
24 ventral boundary, as well as in the proveins territories precursors of the veins 1, 3, 4 and 5

1 (Biehs et al., 1998; Cook et al., 2004). The morphological markers were the 1<sup>st</sup> fold of the  
2 wing pouch, the margins of the pupal and adult wings, and the veins of the adult wings.

3 For the wing discs, four landmarks (1, 3, 5 and 7) were placed in the distal part of the  
4 tissue, at the intersections of the DV boundary with the proveins L1, L3, L4 and L5,  
5 respectively. Four other landmarks (2, 4, 6 and 8) were placed at the distal tips of the  
6 proveins 1, 3, 4 and 5, respectively, which coincide with the intersections of these proveins  
7 and the 1<sup>st</sup> fold of the pouch. Note that the position of vein L4 coincides with the end of the  
8 anterior compartment (shown by Ci territory). In addition, two sets of semi-landmarks were  
9 placed on the DV boundary. The first one (9-14) was placed in the portion of the DV  
10 boundary contained within proveins L1 and L3, and the second one (15-17) was placed in the  
11 portion within L4 and L5. Data were initially collected for ventral and dorsal compartments  
12 of the wing disc. However, the ventral compartment was found to be quite variable because  
13 this part of the disc starts to evert very early. Thus only the data for the dorsal disc were  
14 considered.

15 For the pupal wings, four landmarks (1, 3, 5 and 7) were placed at the intersections of  
16 proveins L1, L3, L4 and L5 with the wing margin, and four others (2, 4, 6 and 8) at the  
17 proximal tips of proveins L1, L3, L4 and L5. As in the wing discs, two sets of semi-  
18 landmarks were placed along the wing margin. One (9-14) was placed in the portion of the  
19 wing margin contained within proveins L1 and L3, and another (15-17) in the portion within  
20 L4 and L5.

21 For the adult wings, four landmarks (1, 3, 5 and 7) were placed at the intersections of  
22 veins L1, L3, L4 and L5 with the wing margin. Landmarks 4 and 6 were placed at the  
23 intersections between the anterior cross-vein and veins L3-L4; landmark 8 was placed at the  
24 intersection between veins L5 and L6 (anal crossvein) and landmark 2 at the proximal end of  
25 vein L1. Again, two sets of semi-landmarks were placed along the wing margin between L1-  
26 L3 (9-14) and L4-L5 (15-17).

27

## 1 *Shape analysis.*

2           The combined data on landmark and semi-landmark positions from the larval discs  
3 and the pupal and adult wings was subjected to generalized Procrustes superimposition  
4 (Rohlf & Slice, 1990), using the program tpsRelw  
5 (<http://life.bio.sunysb.edu/morph/index.html>). Procrustes superimposition scales forms to the  
6 same size, translates their centroids to the same location, and rotates them to minimize the  
7 squared deviations around each point. This separates the useful size and shape information  
8 from the nuisance parameters introduced by the arbitrary location and rotation of the  
9 specimens within the images. The positions of the semi-landmarks were slid along each  
10 dorsal-ventral boundary segment defined by the boundary landmarks to minimize deviation  
11 along the segment using the standard model in tpsRelw (Rohlf). Although we measured the x  
12 and y coordinates of 17 landmarks and semi-landmarks, there were only 18 degrees of  
13 freedom in the shape data after registration and sliding.

14           Analysis of shapes using tpsSmall (<http://life.bio.sunysb.edu/morph/index.html>)  
15 shows that Euclidean distances were extremely highly correlated with Procrustes distances  
16 ( $r=0.999964$ ), despite the wide differences in shapes of larval, pupal and adult forms. We  
17 performed a principal component analysis on the shape data, retaining 18 PC axes for further  
18 analyses.

19           Outliers were diagnosed using a robust approach for the first 5 shape principal  
20 component axes within each genotype and stage using the Diagnostics option in the  
21 Robustreg procedure in SAS, employing a dummy dependent variable. Specimens more than  
22 3 S.D.s away from the robust means were identified as outliers. Images of putative outliers  
23 were re-examined to determine the source of the unusual measurements. For adult wings,  
24 wings with relatively extreme ds and shf2 phenotypes were identified by Robustreg as  
25 outliers. We retained these in the data, as the deviations were relatively modest. For larval  
26 wings, one shf2 outlier appeared to have a damaged disc, and was omitted. Four pupal  
27 outliers (two ds, and two yw) greater than 6 S.D. from the robust mean proved to have

1 unusual staining patterns, or distortions of the epithelia, and these were omitted. The final  
2 shape data set consists of 108 specimens. No univariate outliers for size (area or centroid  
3 size) were detected using Grubb's test.

4 To test whether genotypes differed in the developmental transformations they undergo  
5 from larval to pupal to adult form, we used a multivariate analysis of variance (MANOVA).  
6 Type III sums of squares and cross-products were used to calculate test statistics. The  
7 variance of shape was very different among developmental stages, which violates the  
8 assumption of homogeneous variances used for conventional statistical tests. To provide an  
9 alternative test, we performed MANOVAs of data randomized to make the null hypothesis of  
10 no effect true. We first decomposed each observation into the grand mean, plus residuals  
11 corresponding to stage, genotype, and genotype by stage data, and residual as follows  
12

$$13 \quad S_{sgki} = \bar{S}_k + \bar{R}_{sk} + \bar{R}_{gk} + \bar{R}_{sgk} + \epsilon_{sgki}$$

14  
15 where  $s$  indexes developmental stage,  $g$  indexes genotype,  $k$  indexes the shape variable,  $i$  the  
16 individual, the overbar indicates a mean shape, and  $\epsilon_{sgki}$  is the deviation of the individual  
17 from the stage-genotype mean. We then randomized just the deviations used to test a  
18 particular hypothesis, holding all other aspects of the observation constant. For example, to  
19 test for stage by genotype interactions, we randomized  $\bar{R}_{sgk}$  values among individuals within  
20 stages. The values of Wilks' lambda were retained from 1,000 randomized analyses, and  
21 compared with the Wilks' lambda obtained from analyzing the observed data.

22

### 23 ***Scalar measures***

24 The standardized distances between the 28 possible pairwise combinations of the 8  
25 landmarks were obtained from the Cartesian coordinates of the landmarks corrected by the

1 centroid size. Centroid size is proportional to the square root of wing area. In addition, we  
2 measured the standardized lengths for a portion of the anterior margin using landmarks 1-3  
3 and semi-landmarks 9-14, and for a portion of the posterior margin using landmarks 5-7 and  
4 semi-landmarks 15-17 (Figure 4).

5 Three areas were calculated using the surveyor's formula for calculating areas of  
6 polygons. The first area was obtained by calculating the area of the regular polygon within  
7 the landmarks 1-4 and semi-landmarks 9-14, thus obtaining a proxy of the anterior wing area  
8 ('Anterior'). The second area is for the polygon defined by the landmarks 3-6 which contains  
9 the region within the longitudinal veins L3 and L4 ('Middle'). The third area is the one of the  
10 regular polygon defined by landmarks 5-8 and semi-landmarks 15-17, and gives a proxy of  
11 the posterior wing area ('Posterior') (Figure 4).

12 Standardized lengths and areas were compared between developmental stages and  
13 between genotypes by calculating means ratios. Values of variance for these ratios were  
14 obtained by bootstrapping the data. For example, change in the standardized length between  
15 landmarks 2 and 8 (stlen28) during the larval to pupal transition in the *yw* genotype was  
16 calculated with the following procedure: individual values for stlen28 in the *yw* pupal wings  
17 population were re-sampled with replacement a number of times equal to the number of  
18 individuals in the population. The mean on the re-sampled data was calculated and divided  
19 by the mean obtained by the same approach on the *yw* larval wing population. This procedure  
20 was repeated 1000 times providing thus a distribution of values for the ratio of stlen28 (pupa)  
21 / stlen28(larva) of the *yw* genotype.

22

### 23 *Analyses*

24 Statistical tests were carried out in the GLM procedure in SAS (), assuming that  
25 stage, genotype and sex are fixed factors. Type III sums of squares and cross-products were  
26 used for statistical testing. When interaction terms had  $P > 0.2$ , they were dropped from the  
27 final model. Post-hoc comparisons among genotypes were adjusted within traits for multiple

1 comparisons using the Tukey-Kramer method. The standard errors of ratios of wing areas  
2 were approximated using standard formulas for the variance of a ratio, and tests for  
3 differences among ratios assumed that the differences are normally distributed. To do this  
4 formula, we had to assume that the covariance of areas between stages is 0, leading to an  
5 overestimate of the variance, and conservative tests for differences among the ratios.

## 6 **Results**

### 7 *Size over stages*

8 Means and standard errors for areas are shown in Table 1. Analysis of log<sub>10</sub> area in a  
9 model with stage, sex and genotype as factors shows that the between stage differences are  
10 highly significantly different from 0 ( $P < 0.0001$  for all comparisons).

11 Ratios for changes in area between stages are shown in suppl. figure 1. The dorsal  
12 area expands markedly during development. The ratios of pupal to larval wing areas are  
13 similar for the three genotypes, increasing by factors of  $2.1 \pm 0.2$  (*ds*),  $2.3 \pm 0.2$  (*shf2*) and  
14  $2.4 \pm 0.1$  for the wild-type (*yw*). At the pupal to adult transition the increases in wing area are  
15 all significantly different from each other, increasing by factors of  $6.1 \pm 0.4$  for *ds*,  $5.0 \pm 0.4$   
16 for *shf2*, and  $4.0 \pm 0.2$  for *yw*. Wing area increases between the larval and adult stages by  
17 factors of  $12.6 \pm 1.3$  (*ds*),  $11.8 \pm 0.6$  (*shf2*) and  $9.7 \pm 0.5$  (*yw*). The growth ratio of *yw* is  
18 significantly lower than those of the other two genotypes.

19

### 20 *Shape over stages*

21 To examine the relative shapes of individuals at each stage, we performed canonical  
22 discriminant analyses on the principal components of the shape data. Figure 5 plots the scores  
23 on the first and second canonical axes when the discriminant analysis used developmental  
24 stage as the classification variable. Larval, pupal and adult shapes are extremely distinct.  
25 Note that the variation among individuals within stages is quite different. As a result,

1 standard statistical tests across stages are likely to be biased. A MANOVA on the shape data  
2 showed that the effect of stage was highly significant (Wilks'  $\lambda=0.00159$ , num df=38, den  
3 df=158,  $P<0.0001$ ).

4 To enable visualization of shape differences, we used the program Lory (Márquez et  
5 al., 2012) to show one pattern of relative expansion or contraction that can transform one  
6 mean shape into another. Figure 6 plots stage transformations. The magenta arrows represent  
7 changes in relative locations of landmarks, while the colors between landmarks represent the  
8 inferred expansion and contractions that can bring about the changes in landmark positions.  
9 It is important to realize that these represent only shape change, and not size change. The  
10 transformation shown is a hypothesis, as other patterns of expansion and contraction can lead  
11 to the same shape change at the measured locations.

12 The overall pattern of shape change is that the distal part of the wing, closest to veins  
13 L3 and L4, move to the right in the figure, shown by the magenta arrows, while the proximal  
14 anterior and posterior parts of the boundary are drawn together and to the left, relative to the  
15 rest of the wing. Movie 1 shows the same data as a transformation of the outline of the wing  
16 between stages.

17 Our linear measurements show that during the larval to pupal phase, shape change is  
18 characterized by a narrowing of the tissue along the anterior-posterior axis (e.g., reduction in  
19 the relative distances between pairs of landmarks 2-8; 1-8; 4-8 – suppl. figure 2a) and by an  
20 expansion in the direction of the proximal – distal axis, as illustrated by the increase in the  
21 relative distances between the pairs of landmarks 7-8; 5-8; 3-8, and by the lengthening of the  
22 anterior and posterior margins (suppl. figure 2a). This pattern of shape change is continued  
23 into late pupal development, with a pronounced constriction along the anterior-posterior axis  
24 in the proximal parts of the wing (~ 50 % decrease in the distance between the pairs of  
25 landmarks 2-8;1-4;1-8 and 1-6) and elongation along the proximal-distal axis (suppl. figure  
26 2B).

27



## 1 ***Differences in shape among genotypes***

2 We tested for differences in shape between genotypes within stages using a  
3 multivariate analysis of variance, with the results shown in Table 3. In all three stages, there  
4 were highly significant differences among genotypes.

5 Figure 7 plots the differences between genotypes relative to the *yw* genotype. We  
6 used *yw* as the reference as the mutations it carries are not known affect wing development.  
7 Comparison of *yw* and *ds* suggest that differences in the anterior- and posterior-most regions  
8 that will become proximal in the adult exist from the larval stage, but that the majority of the  
9 difference between these genotypes arise during pupal development, and the peripheral areas  
10 of the blade expand more in *ds* mutants than *yw*. Comparison of *yw* and *shf2* suggests that  
11 the region between L3 and L4 is markedly smaller in *shf2* from the larval stage. This  
12 contraction persists, but is balanced principally by an expansion of the proximal part of the  
13 wing anterior to L3 in later stages.

14 To diagnose where these differences arise we examined the ratios *ds/yw* and *shf2/yw*  
15 of the standardized lengths and areas. These ratios were first conducted on the adult data to  
16 see what is different in adult wings between *yw* and the mutants, and then on the larval and  
17 pupal wing data to check when the variation observed in the adults appears during  
18 development.

19 The ratios *ds/yw* of the standardized lengths for the adult wings are shown in suppl.  
20 fig. 3A. The *ds* adult wings are narrower relative to *yw* along the P/D axis in the distal part, as  
21 well as broader along this same axis in the proximal part. This is shown by the shift of  
22 landmarks 4 and 6 towards the distal parts. These two landmarks indeed have higher relative  
23 distances with respect to landmarks 1, 2 and 8, as well as lower relative distances with  
24 respect to landmarks 3, 5 and 7. In addition, *ds* wings are broader along the anterior-posterior  
25 axis, as shown by increase in relative distances between the pairs of landmarks 4-6 and 3-5.  
26 Regarding the areas (suppl fig 3B), our data show that *ds* wings are 1.3 times bigger than *yw*,

1 and this is due to an increase in all the three areas measured with a slightly more important  
2 contribution of the “Middle” area.

3 Examining these ratios in the larval and pupal wings shows that the differences  
4 observed between *ds* and *yw* adult wings appear at different times during development. The  
5 proximo-distal narrowing of the distal part of the wing is observed in the larval stage ( Figure  
6 8a, suppl. fig. 4a), whereas the proximo-distal lengthening of the proximal wing, as well as  
7 the broadening in the A/P axis appears at the pupal stage (Figure 8b, suppl. fig. 4b). The  
8 variation in wing area occurs mostly during the pupal to adult transition, as well as the shift  
9 of landmarks 4-6 towards the distal parts of the wing (Figure 8c, suppl. fig. 4c).

10 Supplementary Figure 5a shows the ratios *shf2/yw* for the standardized lengths in  
11 adult wings. The principal differences are the reduction of the distances between the pairs of  
12 landmarks 3-5 and 4-6, in *shf2*, and the corresponding reduction in that area of the wing  
13 (intervein L3L4) (suppl. fig 5b). In the case of *shf2*, the differences observed in the adult  
14 wings are established in the larval wing (Figure 9), with relatively small changes after that  
15 stage.

16

### 17 *Shape transformations between stages*

18 Randomized MANOVA analysis showed a highly significant effect of genotype over stages  
19 (Wilks'  $\lambda=0.078$ , minimum of 1,000 randomized Wilks'  $\lambda=0.244$ ). This result demonstrates  
20 that some of the differences among genotypes are consistent across all three stages. There  
21 was also a highly significant stage by genotype interaction (Wilks'  $\lambda=0.078$ , minimum of  
22 1,000 randomized Wilks'  $\lambda=0.568$ ), which demonstrates that there are changes in the  
23 relationships among genotypes over stages.

24 Figure 10 shows the scores on the first and second canonical axes when the  
25 discriminant analysis used genotype as the classification variable. Genotypes are well  
26 separated on these axes, with a few exceptions. The similar locations of genotypes across

1 stages suggests that shape differences in the larva are retained through the pupa and adult  
2 shapes.

3 To get a sense for the size of stage and genotype effects, we calculated the matrix of  
4 Euclidean distances in shape space (centroid size units) among individuals in each  
5 stage/genotype combination, with the results shown in Table 3. The mean distance between  
6 individuals within stages is 0.13 (0.14 within larvae, 0.19 with pupae, 0.07 within adults,)  
7 while it is 0.51 between larval and pupal shapes, 0.32 between pupal and adult shapes, and  
8 0.74 between larval and adult shapes. Thus, pupal shape is more similar to adult shape than  
9 to larval shape, suggesting that eversion and folding has a larger effect on shape than pupal  
10 development. The differences in shape among genotypes within stages are less dramatic.  
11 For larvae the average distance between different individuals with the same genotype is 0.11,  
12 while the differences among individuals of different genotypes is 0.17. In pupae the within  
13 genotype distances average 0.17, while the among genotype distances average 0.22. Adults  
14 of the same genotype average just 0.03 in distance, while the among genotype distances  
15 average 0.11. This is likely to be due to higher accuracy of measurements in adults.

16 The genotype-stage interactions demonstrate that the developmental transformations  
17 between stages differ among genotypes. To get a sense for the magnitude of the genotype-  
18 stage interactions, we calculated the angles between shape change vectors. To do this, we  
19 calculated the average direction of shape change between stages for each genotype as the  
20 difference in mean phenotype across each transition. We then calculated the angles between  
21 these shape change vectors, with the results shown in Table 4. Completely independent  
22 shape changes would have an angle of 90, while identical transformations have an angle of 0.  
23 The angles are quite close to the minimum of 0, and suggest that genotypes are undergoing  
24 similar transformations. In particular, the transformations from larval to adult shapes differ  
25 on average by just 8 degrees. Angles involving pupal shapes are generally larger, which  
26 probably reflects the larger variation in pupal shape than the other two stages, with  
27 correspondingly larger uncertainty as to the true pupal mean.

## 1 **Discussion**

2           Attempts to understand the developmental causes of quantitative natural variation  
3 have been hindered by the complexity of the developmental processes (Parsons & Albertson,  
4 2013). Even in a relatively simple structure such as the *Drosophila* wing, many  
5 developmental processes contribute to morphogenesis (Matamoro-Vidal et al., 2015). The  
6 tremendous progress of developmental biology in quantifying many aspects of  
7 morphogenesis makes it likely that these difficulties can be overcome (Oates et al., 2009). We  
8 have used a framework based on geometric morphometrics that allows us to quantify wing  
9 shape and size variation during development. We have applied this to determine when  
10 genotypic differences in wing shape and size appear during development. By narrowing the  
11 time frame when differences arise, we can narrow down the number of candidate  
12 developmental processes that potentially cause genotypic differences.

13           In the language of geometric morphometrics, features sharing identity or homology  
14 among specimens are referred to as landmarks. We used the relative positions of landmarks to  
15 compare changes in size and shape between developmental stages and genotypes. Landmark  
16 homology is assured when comparing wing specimens at the same developmental stage, but  
17 is not always clear when comparing specimens at different developmental stages. These  
18 uncertainties urge some caution in interpreting our results. For example, the dorsal-ventral  
19 (D-V) boundary in the larval disc is undoubtedly homologous with the wing margin in pupae  
20 and adults. On the other hand, the position of landmarks along the D-V boundary defined by  
21 Delta expression (landmarks 1, 3, 5 and 7) may be shifted along that boundary relative to  
22 those visible in the adult wing. The homology of the other four landmarks (2, 4, 6 and 8) is  
23 less assured across developmental stages, particularly when compared to the adult wing.  
24 However, it seems likely that discrepancies in the placement of these landmarks will be  
25 consistent among genotypes. If this assumption is met, differences among genotypes (and

1 sexes) in how these landmarks are displaced from one developmental stage to another will  
2 reflect developmental differences.

3 Our results could probably be improved through the use of more sources of data on  
4 the locations of proveins and compartment boundaries early in development. For example,  
5 staining of the Wingless expression domain in the larval and pupal wings would allow adding  
6 new landmarks by visualization of the hinge/blade boundary in the larval and pupal wings, as  
7 well as the anterior and posterior proximal margins (Kolzer et al., 2003). In addition, staining  
8 L2 vein domain with antibodies against p-Mad or Srf (Cordero et al., 2007) would also add a  
9 new landmark and improve wing shape measurement.

10 The developmental stage at which differences between the control (*yw*) and the two  
11 mutant genotype (*ds* and *shf2*) varied. In the case of *shf2*, the major pattern of variation  
12 between the adult *shf2* wings and the *yw* adult wings was evident at the earliest stage studied.  
13 Larval, pupal and adult *shf2* wings all had reduced spacing between veins L3-L4 and reduced  
14 area compared to *yw*. This suggests that the developmental processes causing this pattern of  
15 variation act early in larval development. Previous studies of the *shf2* allele are consistent  
16 with our findings (Glise et al. 2005; Gorfinkel et al. 2005). The *shf* gene codes for a protein  
17 involved in the stabilization and diffusion of Hedgehog (Hh) in the larval wing disc. The  
18 boundary of Hh signaling in the anterior compartment defines the position of the longitudinal  
19 vein L3 along the A-P axis (Blair, 2007). In *shf2*, Shifted fails to properly stabilize Hh, thus  
20 shifting posteriorly the Hh signaling boundary and the position of vein L3. In addition, *shf2*  
21 wing discs have a reduced expression domain of Dpp, which is a wing growth factor. Thus,  
22 the variation in wing shape caused by the *shf2* mutation is due to modification of early larval  
23 signaling events.

24 In contrast, we found that the size and shape difference between *ds* and *yw* have a  
25 more complex developmental trajectory. Changes at all the developmental stages we studied  
26 contribute to the overall pattern of adult wing shape and size variation between *ds* and *yw*.  
27 Some shape differences between *ds* and *yw* appear early during larval development, others

1 during the larval to pupal eversion, and some others during pupal development. For size, the  
2 differences appeared during pupal development. As in the case of *shf2*, these findings are  
3 consistent with known roles of Dachshous in epithelial morphogenesis, but they also point out  
4 to some unknown effects. Dachshous plays an important contribution in orienting cell division  
5 during larval development (Baena-López et al., 2005; Mao et al., 2011). In addition,  
6 Dachshous mediates cell rearrangements and orientation of cell divisions in response to global  
7 tissue stress during pupal development in wing and notum epithelia (Aigouy et al., 2010;  
8 Bosveld et al., 2012). Interestingly, our data suggest novel roles of Dachshous in  
9 morphogenesis by contributing to tissue shape changes during the larval to pupal transition,  
10 as well as to tissue growth during pupal development.

11 The concordance between the known developmental roles of these well-studied  
12 mutations and the differences we observe validates our approach to the quantification of  
13 developmental events. It suggests that morphometric studies of shape transformations in  
14 genotypes with an unknown developmental basis could provide useful hypotheses about the  
15 developmental events involved.

16 Our work allows us to investigate both the magnitudes of differences in shape and  
17 size, and the directions of changes between the developmental stages studied. Consistent  
18 with the visually apparent differences in shapes among stages (e.g. Fig. 3), and the relatively  
19 dramatic folding and eversion that takes place during pupariation, larval wing shape is more  
20 different from pupal wing shape than pupal is from adult wing shape. Differences among  
21 individuals with the same genotype at the same developmental stages are noticeably smaller  
22 than differences among genotypes. While the differences among stages and genotypes are  
23 clear, it is nevertheless apparent that the transformations that each shape undergoes during  
24 development is rather similar. This is confirmed by the relatively small angles between  
25 developmental trajectories of different genotypes.

26

27

## 1 **Conclusion**

2           Our approach successfully identified the developmental stage at which variation  
3 appears in two cases for which the developmental causes of the variation were known. This  
4 suggests that our approach should be useful to study the developmental causes of wing shape  
5 variation in cases where we are blind regarding the developmental causes of the variation, as  
6 in the case of natural variation.

7

## 8 **Acknowledgments**

9 We thank Jinghua Gui for technical assistance. AMV thanks the Courtier-Orgogozo lab  
10 members for stimulating discussions. This research was funded by the Finnish Academy to I.  
11 S. -C.

12

13

14

15

16

17

18

19

20

21

22

23

24

25

26

27

1

## 2 **References**

- 3 Aigouy, B., Farhadifar, R., Staple, D. B., Sagner, A., Röper, J.-C., Jülicher, F., & Eaton, S.  
4 (2010). Cell flow reorients the axis of planar polarity in the wing epithelium of  
5 *Drosophila*. *Cell*, *142*(5), 773–86. <https://doi.org/10.1016/j.cell.2010.07.042>
- 6 Arnoult, L., Su, K. F. Y., Manoel, D., Minervino, C., Magriña, J., Gompel, N., &  
7 Prud'homme, B. (2013). Emergence and diversification of fly pigmentation through  
8 evolution of a gene regulatory module. *Science (New York, N.Y.)*, *339*(6126), 1423–6.  
9 <https://doi.org/10.1126/science.1233749>
- 10 Baena-López, L. A., Baonza, A., & García-Bellido, A. (2005). The orientation of cell  
11 divisions determines the shape of *Drosophila* organs. *Current Biology : CB*, *15*(18),  
12 1640–4. <https://doi.org/10.1016/j.cub.2005.07.062>
- 13 Biehs, B., Sturtevant, M. A., & Bier, E. (1998). Boundaries in the *Drosophila* wing imaginal  
14 disc organize vein-specific genetic programs. *Development (Cambridge, England)*, *125*,  
15 4245–4257.
- 16 Blair, S. S. (2007). Wing vein patterning in *Drosophila* and the analysis of intercellular  
17 signaling. *Annual Review of Cell and Developmental Biology*, *23*, 293–319.  
18 <https://doi.org/10.1146/annurev.cellbio.23.090506.123606>
- 19 Bosveld, F., Bonnet, I., Guirao, B., Tlili, S., Wang, Z., Petitalot, A., ... Bellaïche, Y. (2012).  
20 Mechanical control of morphogenesis by Fat/Dachsous/Four-jointed planar cell polarity  
21 pathway. *Science (New York, N.Y.)*, *336*(6082), 724–7.  
22 <https://doi.org/10.1126/science.1221071>
- 23 Chan, Y. F., Marks, M. E., Jones, F. C., Villarreal, G., Shapiro, M. D., Brady, S. D., ...  
24 Kingsley, D. M. (2010). Adaptive evolution of pelvic reduction in sticklebacks by  
25 recurrent deletion of a *Pitx1* enhancer. *Science (New York, N.Y.)*, *327*, 302–305.  
26 <https://doi.org/10.1126/science.1182213>
- 27 Clark, H. F., Brentrup, D., Schneitz, K., Bieber, A., Goodman, C., & Noll, M. (1995).  
28 *Dachsous* encodes a member of the cadherin superfamily that controls imaginal disc  
29 morphogenesis in *Drosophila*. *Genes & Development*, *9*(12), 1530–1542.  
30 <https://doi.org/10.1101/gad.9.12.1530>
- 31 Cook, O., Biehs, B., & Bier, E. (2004). *brinker* and *optomotor-blind* act coordinately to  
32 initiate development of the L5 wing vein primordium in *Drosophila*. *Development*  
33 *(Cambridge, England)*, *131*(9), 2113–24. <https://doi.org/10.1242/dev.01100>
- 34 Cordero, J. B., Larson, D. E., Craig, C. R., Hays, R., & Cagan, R. (2007). Dynamic  
35 Decapentaplegic signaling regulates patterning and adhesion in the *Drosophila* pupal  
36 retina. *Development*, *134*(10), 1861–1871. <https://doi.org/10.1242/dev.002972>
- 37 Diaz de la Loza, M. C., & Thompson, B. J. (2016). Forces shaping the *Drosophila* wing.  
38 *Mechanisms of Development, In press*. <https://doi.org/10.1016/j.mod.2016.10.003>



- 1 Glise, B., Miller, C. A., Crozatier, M., Halbisen, M. A., Wise, S., Olson, D. J., ... Blair, S. S.  
2 (2005). Shifted, the Drosophila Ortholog of Wnt Inhibitory Factor-1, Controls the  
3 Distribution and Movement of Hedgehog. *Developmental Cell*, 8(2), 255–266.  
4 <https://doi.org/10.1016/j.devcel.2005.01.003>
- 5 Gorfinkiel, N., Sierra, J., Callejo, A., Ibañez, C., & Guerrero, I. (2005). The Drosophila  
6 ortholog of the human Wnt inhibitor factor shifted controls the diffusion of lipid-  
7 modified hedgehog. *Developmental Cell*, 8, 241–253.  
8 <https://doi.org/10.1016/j.devcel.2004.12.018>
- 9 Houle, D., Bolstad, G. H., van der Linde, K., & Hansen, T. F. (2017). Mutation predicts 40  
10 million years of fly wing evolution. *Nature*. <https://doi.org/10.1038/nature23473>
- 11 Houle, D., Mezey, J., Galpern, P., & Carter, A. (2003). Automated measurement of  
12 Drosophila wings. *BMC Evolutionary Biology*, 3, 25. [https://doi.org/10.1186/1471-](https://doi.org/10.1186/1471-2148-3-25)  
13 [2148-3-25](https://doi.org/10.1186/1471-2148-3-25)
- 14 Kolzer, S., Fuss, B., Hoch, M., & Klein, T. (2003). defective proventriculus is required for  
15 pattern formation along the proximodistal axis, cell proliferation and formation of veins  
16 in the Drosophila wing. *Development*, 130(17), 4135–4147.  
17 <https://doi.org/10.1242/dev.00608>
- 18 Mallarino, R., & Abzhanov, A. (2012). Paths Less Traveled: Evo-Devo Approaches to  
19 Investigating Animal Morphological Evolution. *Annual Review of Cell and*  
20 *Developmental Biology*, 28(1), 743–763. [https://doi.org/10.1146/annurev-cellbio-](https://doi.org/10.1146/annurev-cellbio-101011-155732)  
21 [101011-155732](https://doi.org/10.1146/annurev-cellbio-101011-155732)
- 22 Mallarino, R., Campàs, O., Fritz, J. A., Burns, K. J., Weeks, O. G., Brenner, M. P., &  
23 Abzhanov, A. (2012). Closely related bird species demonstrate flexibility between beak  
24 morphology and underlying developmental programs. *Proceedings of the National*  
25 *Academy of Sciences of the United States of America*, 109(40), 16222–7.  
26 <https://doi.org/10.1073/pnas.1206205109>
- 27 Mao, Y., Tournier, A. L., Bates, P. A., Gale, J. E., Tapon, N., & Thompson, B. J. (2011).  
28 Planar polarization of the atypical myosin Dachs orients cell divisions in Drosophila.  
29 *Genes & Development*, 25(2), 131–6. <https://doi.org/10.1101/gad.610511>
- 30 Márquez, E. J., Cabeen, R., Woods, R. P., & Houle, D. (2012). The Measurement of Local  
31 Variation in Shape. *Evolutionary Biology*, 39(3), 419–439.  
32 <https://doi.org/10.1007/s11692-012-9159-6>
- 33 Matamoro-Vidal, A., Salazar-Ciudad, I., & Houle, D. (2015). Making quantitative  
34 morphological variation from basic developmental processes: Where are we? The case  
35 of the *Drosophila* wing. *Developmental Dynamics*, 244(9), 1058–1073.  
36 <https://doi.org/10.1002/dvdy.24255>
- 37 Nijhout, H. F., Cinderella, M., & Grunert, L. W. (2014). The development of wing shape in  
38 Lepidoptera: mitotic density, not orientation, is the primary determinant of shape.  
39 *Evolution & Development*, 16(2), 68–77. <https://doi.org/10.1111/ede.12065>

- 1 Nunes, M. D. S., Arif, S., Schlötterer, C., & McGregor, A. P. (2013). A perspective on micro-  
2 evo-devo: progress and potential. *Genetics*, *195*(3), 625–34.  
3 <https://doi.org/10.1534/genetics.113.156463>
- 4 Oates, A. C., Gorfinkiel, N., González-Gaitán, M., & Heisenberg, C.-P. (2009). Quantitative  
5 approaches in developmental biology. *Nature Reviews. Genetics*, *10*(8), 517–30.  
6 <https://doi.org/10.1038/nrg2548>
- 7 Parsons, K. J., & Albertson, R. C. (2013). Unifying and generalizing the two strands of evo-  
8 devo. *Trends in Ecology & Evolution*, *28*(10), 584–91.  
9 <https://doi.org/10.1016/j.tree.2013.06.009>
- 10 Rohlf, F. J., & Slice, D. (1990). Extensions of the Procrustes Method for the Optimal  
11 Superimposition of Landmarks. *Systematic Zoology*, *39*(1), 40.  
12 <https://doi.org/10.2307/2992207>
- 13 Salazar-Ciudad, I., & Jernvall, J. (2010). A computational model of teeth and the  
14 developmental origins of morphological variation. *Nature*, *464*(7288), 583–6.  
15 <https://doi.org/10.1038/nature08838>
- 16

1  
2  
3  
4  
5  
6  
7  
8  
9  
10

**Tables**

**Table 1.** Sample size, area means and standard deviations by stage and genotype.

|        | genotype    | N  | Area (mm <sup>2</sup> ) | Areas as proportions of total |             |             |
|--------|-------------|----|-------------------------|-------------------------------|-------------|-------------|
|        |             |    |                         | Anterior                      | Middle      | Posterior   |
| Larval | <i>yw</i>   | 16 | 0.0100±0.0015           | 0.547±0.042                   | 0.165±0.018 | 0.288±0.030 |
|        | <i>ds</i>   | 8  | 0.0102±0.0028           | 0.560±0.029                   | 0.137±0.025 | 0.304±0.014 |
|        | <i>shf2</i> | 9  | 0.0077±0.0008           | 0.558±0.030                   | 0.120±0.009 | 0.322±0.032 |
| Pupal  | <i>yw</i>   | 15 | 0.0243±0.0041           | 0.530±0.043                   | 0.143±0.023 | 0.327±0.042 |
|        | <i>ds</i>   | 12 | 0.0210±0.0042           | 0.536±0.034                   | 0.156±0.020 | 0.308±0.026 |
|        | <i>shf2</i> | 15 | 0.0182±0.0049           | 0.613±0.043                   | 0.080±0.013 | 0.308±0.035 |
| Adult  | <i>yw</i>   | 6  | 0.0976±0.0099           | 0.452±0.010                   | 0.166±0.014 | 0.382±0.009 |
|        | <i>ds</i>   | 12 | 0.1286±0.0140           | 0.446±0.006                   | 0.176±0.004 | 0.378±0.006 |
|        | <i>shf2</i> | 16 | 0.0907±0.0097           | 0.495±0.008                   | 0.116±0.009 | 0.389±0.012 |

1

2 **Table 2.** Results from MANOVA of shape data within each stage.

3

| Stage | Effect          | Num df | den df | Wilks' $\lambda$ | P       |
|-------|-----------------|--------|--------|------------------|---------|
| Larva | Genotype        | 36     | 22     | 0.004            | <0.0001 |
|       | sex             | 18     | 11     | 0.208            | 0.08    |
|       | Genotype by sex |        |        |                  | >0.2    |
| Pupa  | Genotype        | 36     | 38     | 0.030            | <0.0001 |
|       | sex             | 18     | 19     | 0.417            | 0.20    |
|       | Genotype by sex | 36     | 38     | 0.177            | 0.13    |
| Adult | Genotype        | 36     | 22     | 0.0002           | <0.0001 |
|       | sex             | 18     | 11     | 0.207            | 0.08    |
|       | Genotype by sex | 36     | 22     | 0.082            | 0.15    |

5

6

7

8 **Table 3.** Mean shape distance between individuals in each stage/genotype combination.

9 Values are the mean Euclidean distances between the 34 element vector of shape coordinates.

10 Diagonals are the average distances between different individuals of the same genotype and  
11 stage.

|              |             | Larva     |           |             | Pupa      |           |             | Adult     |           |             |
|--------------|-------------|-----------|-----------|-------------|-----------|-----------|-------------|-----------|-----------|-------------|
|              |             | <i>yw</i> | <i>ds</i> | <i>shf2</i> | <i>yw</i> | <i>ds</i> | <i>shf2</i> | <i>yw</i> | <i>ds</i> | <i>shf2</i> |
| <b>Larva</b> | <i>yw</i>   | 0.12      | 0.14      | 0.16        | 0.56      | 0.50      | 0.50        | 0.77      | 0.75      | 0.77        |
|              | <i>ds</i>   |           | 0.10      | 0.20        | 0.54      | 0.47      | 0.48        | 0.75      | 0.73      | 0.76        |
|              | <i>shf2</i> |           |           | 0.10        | 0.54      | 0.50      | 0.48        | 0.73      | 0.72      | 0.73        |
| <b>Pupa</b>  | <i>yw</i>   |           |           |             | 0.15      | 0.21      | 0.21        | 0.28      | 0.24      | 0.30        |
|              | <i>ds</i>   |           |           |             |           | 0.17      | 0.22        | 0.36      | 0.31      | 0.38        |
|              | <i>shf2</i> |           |           |             |           |           | 0.18        | 0.34      | 0.32      | 0.35        |
| <b>Adult</b> | <i>yw</i>   |           |           |             |           |           |             | 0.02      | 0.11      | 0.07        |
|              | <i>ds</i>   |           |           |             |           |           |             |           | 0.04      | 0.16        |
|              | <i>shf2</i> |           |           |             |           |           |             |           |           | 0.02        |

13

14

15

16

17 **Table 4.** Angle in degrees between the vectors of shape changes for each genotype.

18

19

20

| Comparison      | <i>yw vs. ds</i> | <i>yw vs. shf2</i> | <i>ds vs. shf2</i> |
|-----------------|------------------|--------------------|--------------------|
| larval to pupal | 9.9              | 16.0               | 16.8               |
| pupal to adult  | 25.4             | 14.3               | 19.4               |
| larval to adult | 7.8              | 6.3                | 9.8                |

## 1 **Figure legends**

2 **Figure 1. Overview of Drosophila wing development. a.** 2<sup>nd</sup> instar larval disc. **b.** 3<sup>rd</sup> instar

3 larval disc with compartments defined by the dorsal/ventral (D/V) and anterior/posterior

4 (A/P) boundaries, provein domains (L2, L3, L4, L5) and morphogen gradients of Dpp,

5 (produced by cells at the A/P boundary – light blue shading) and Wg, (produced by cells at

6 the D/V boundary – orange shading). **c.** Evagination of the disc. The wing pouch folds along

7 its D/V boundary (thick dashed line), apposing dorsal and ventral compartments, and the

8 blade extends and become elongated along the proximal–distal axis. The part of the hinge

9 behind the blade folds back and elongates as the blade does. **d.** Early pupal wing after

10 evagination and expansion. **e.** Late-pupal wing. The hinge contraction creates tension that

11 drives the elongation of the wing blade. At this stage the shape of the wing blade is similar to

12 adult shape.

13

14 **Figure 2. Adult wings for the three genotypes studied. a.** *yw*. **b.** *sh<sup>f</sup>*. **c.** *ds* (*ds<sup>1</sup>/ds<sup>05142</sup>*).

15 Black arrows highlight the longitudinal veins 3 and 4.

16

17 **Figure 3. Landmarks and semi-landmarks used for the morphometric analyses. a.** 3<sup>rd</sup>

18 instar larval wing stained with antibodies against Cubitus interruptus (Ci, green) and against

19 Delta (Dl, magenta). Wing shape was measured by gathering 8 landmarks (big white dots

20 numbered 1-8) and 9 semi-landmarks (smaller white dots). **a'**. Diagram of a 3<sup>rd</sup> instar larval

21 wing showing how the Delta staining (proveins and D/V boundary) and the 1<sup>st</sup> fold were used

22 for landmarks and semi-landmarks positioning. **b.** Pupal wing at 5 h after puparium

23 formation (APF) with same staining than in 'a' and landmarks/semi-landmarks positions

24 hypothesized to be homologous to those in 'a'. **b'**. Diagram of 5 h APF pupal wing showing

25 how Delta staining (proveins), and the wing margin were used for landmarks and semi-

1 landmarks positioning. **c.** Dorsal adult wing with landmarks and semi landmarks positions

2 hypothesized to be the same than in 'a' and 'b'.

3

4 **Figure 4. Wing diagrams illustrating areas and lengths compared over stages and**

5 **genotypes.** Three areas were measured: interveins A and B (anterior, green), intervein c

6 (middle, magenta) and intervein d (posterior, blue). We measured the distances between the

7 twenty-eight possible pairwise combinations of the eight landmarks. Only four distances are

8 shown in the diagram for clarity, between landmarks 2-3 (len23); 3-5 (len35); 5-8 (len58) and

9 7-8 (len78). In addition, we measured the length of a portion of the anterior margin (lenAnt)

10 and of a portion of the posterior margin (lenPost) using landmarks landmarks 1, 3, 5, 7 and

11 the semi-landmarks.,

12

13 **Figure 5. Scores for shape on canonical axes chosen to discriminate stages.**

14

15 **Figure 6. Differences among stages.** Colors represent inferred changes in the relative areas

16 of parts of wing necessary to transform the form from the earlier stage (e.g. larva) to the later

17 (e.g. adult) stage. Expansions and contractions are shown on a  $\log_2$  scale, the orange at +1

18 represents a doubling to relative area, while blue at -1 represents a local halving of area.

19 Magenta arrows represent the pattern of change in location of landmarks (numbered 1 to 8)

20 and of semi-landmarks.

21

22 **Figure 7. Differences among genotypes within stages.** The yw genotype is taken as the

23 reference, and colors represent changes in relative area necessary to transform the wing at a

24 given stage (larva, pupa or adult) into the other two genotypes. Note that the scale differs

25 from that in Fig. 6. The top of the scale represents an increase by a factor of 1.23.

1 **Figure 8. Developmental stage at which the adult wing shape differences between *ds* and**  
2 ***yw* appear.** The boxplots show ratios of means between *yw* and *ds* genotypes at each stage  
3 for standardized distances between the pairs of landmarks (*stlen*) and total wing area (*total*  
4 *area*). Variance for the ratios were obtained by bootstrap ( $n = 1000$ , see methods). Notches on  
5 the boxplots display the 95 % confidence interval around the median. For clarity, only few  
6 representative variables are shown (see suppl. figure 4 for the other variables). **a.** Variables  
7 for which the differences between *ds* and *yw* adult wings appear before the 3<sup>rd</sup> instar larval  
8 stage. **b.** Variables for which the differences between *ds* and *yw* adult wings appear during the  
9 larva to pupa transition. Note that for *stlen46*, there is a continuous increase of the ratio  
10 during larval and pupal development to reach the adult ratio. **c.** Variables for which the  
11 differences between *ds* and *yw* adult wings appear during the pupa to adult transition. L,  
12 larva; P, pupa; A, adult. For each stage, a diagram showing the overall shape difference  
13 between genotypes (from Fig. 7) is shown.

14

15 **Figure 9. Developmental stage at which the adult wing shape differences between *shf2***  
16 **and *yw* appear.** The boxplots were obtained as in Figure 8. All major differences between  
17 *shf2* and *yw* adult wings are observed since the 3<sup>rd</sup> instar larval stage. L, larva; P, pupa; A,  
18 adult. A diagram showing the overall larval wing shape difference between genotypes *yw* and  
19 *shf2* (from Fig. 7) is shown.

20

21 **Figure 10. Scores for shape on canonical axes chosen to discriminate genotypes.**

22

**Figure 1**

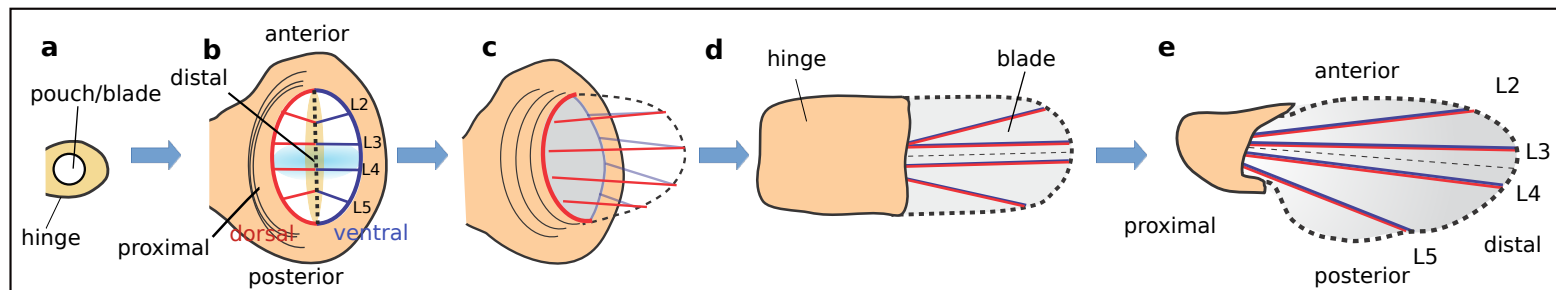



**Figure 2**

a *wild-type (yw)*

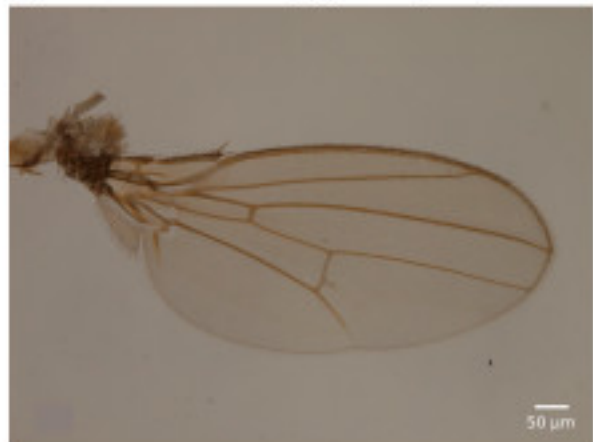

b *shifted (shf<sup>2</sup>)*

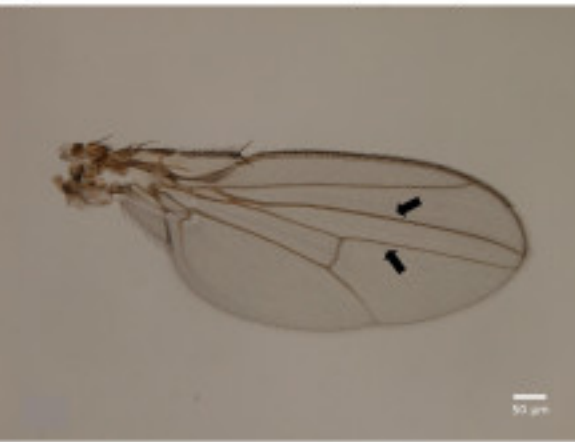

c *dachsous (ds<sup>1</sup>/ds<sup>05142</sup>)*

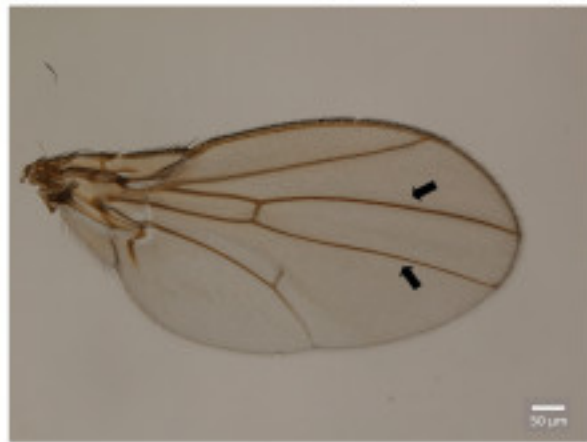

**Figure 3**

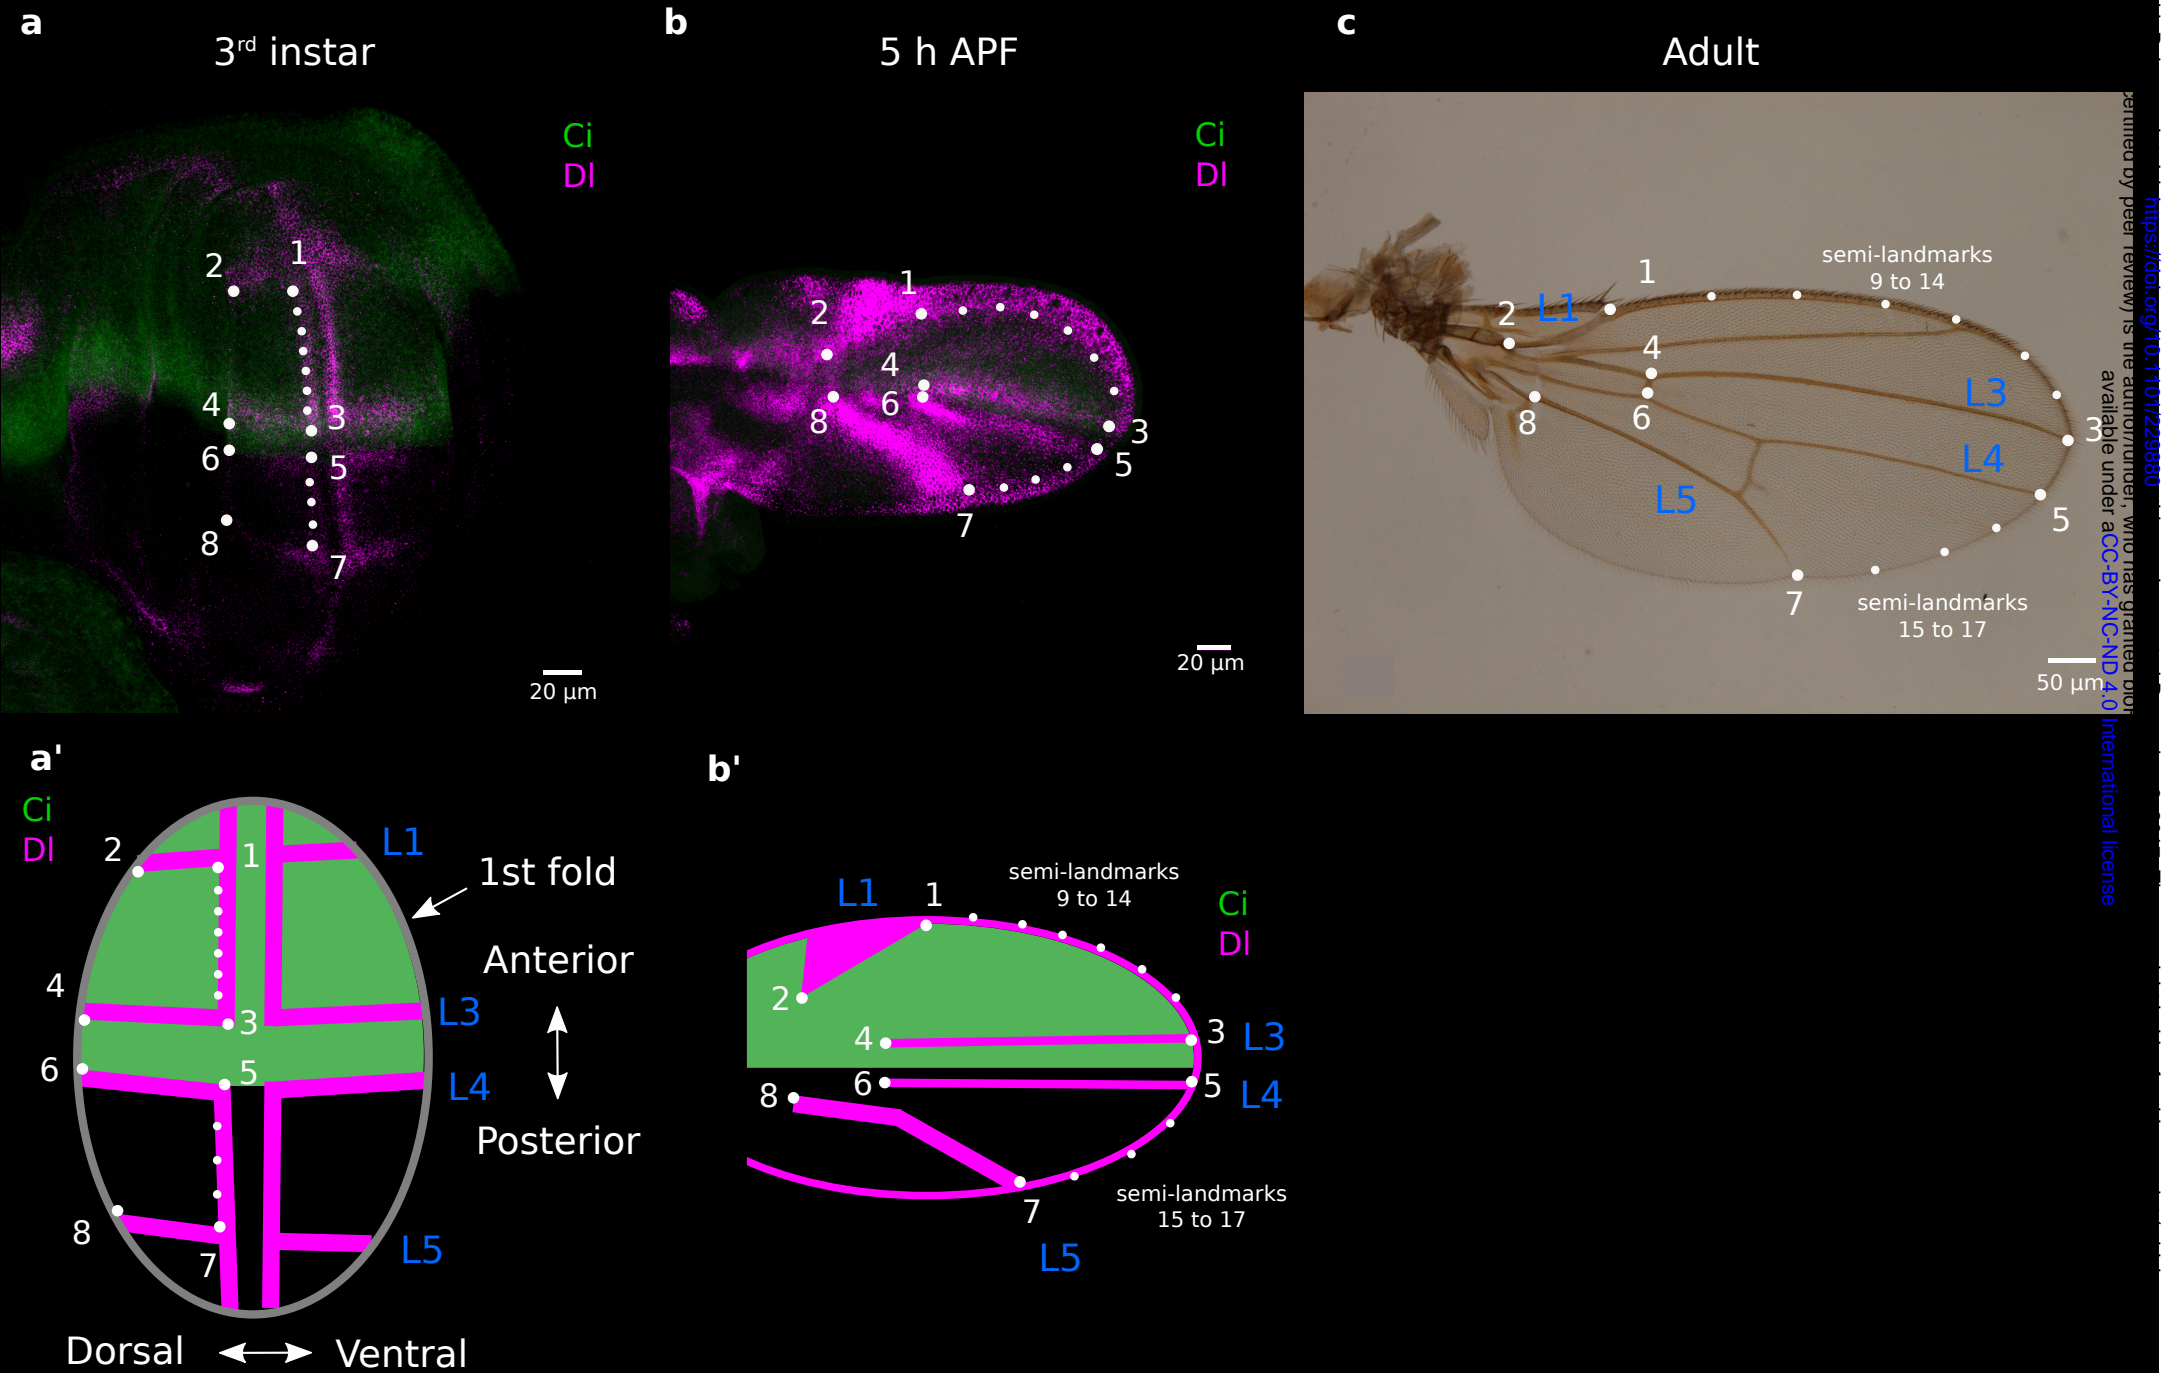

**Figure 4**

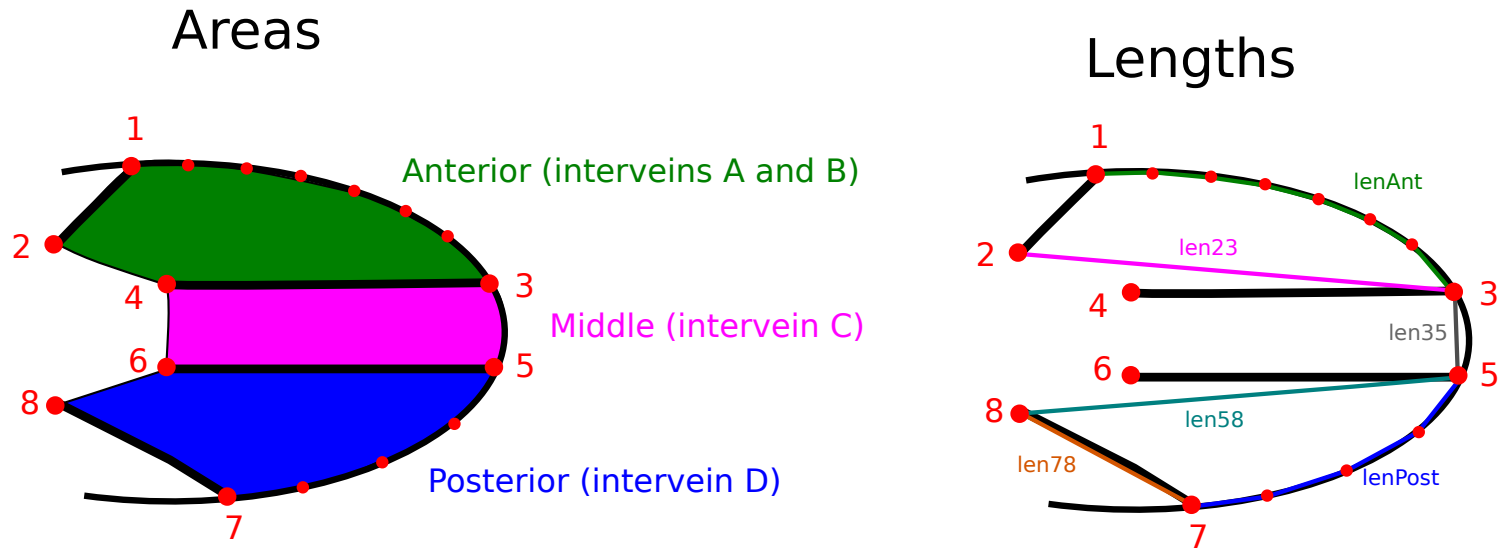

**Figure 5**

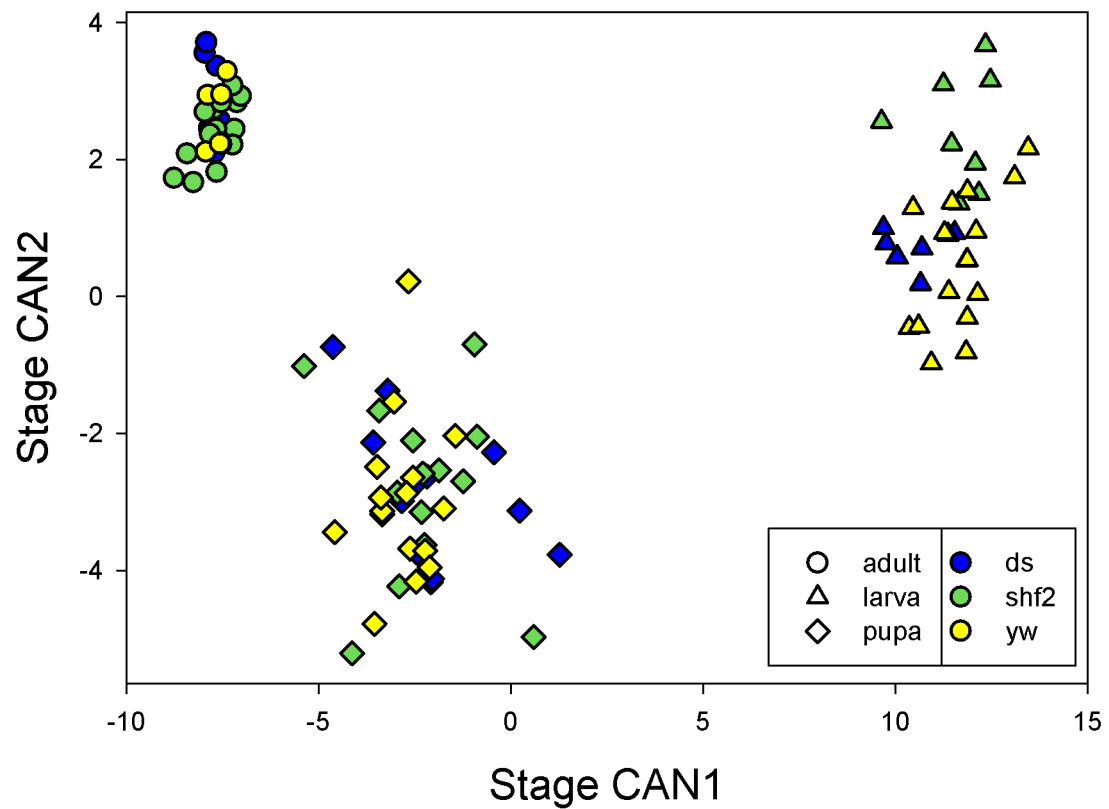

**Figure 6**

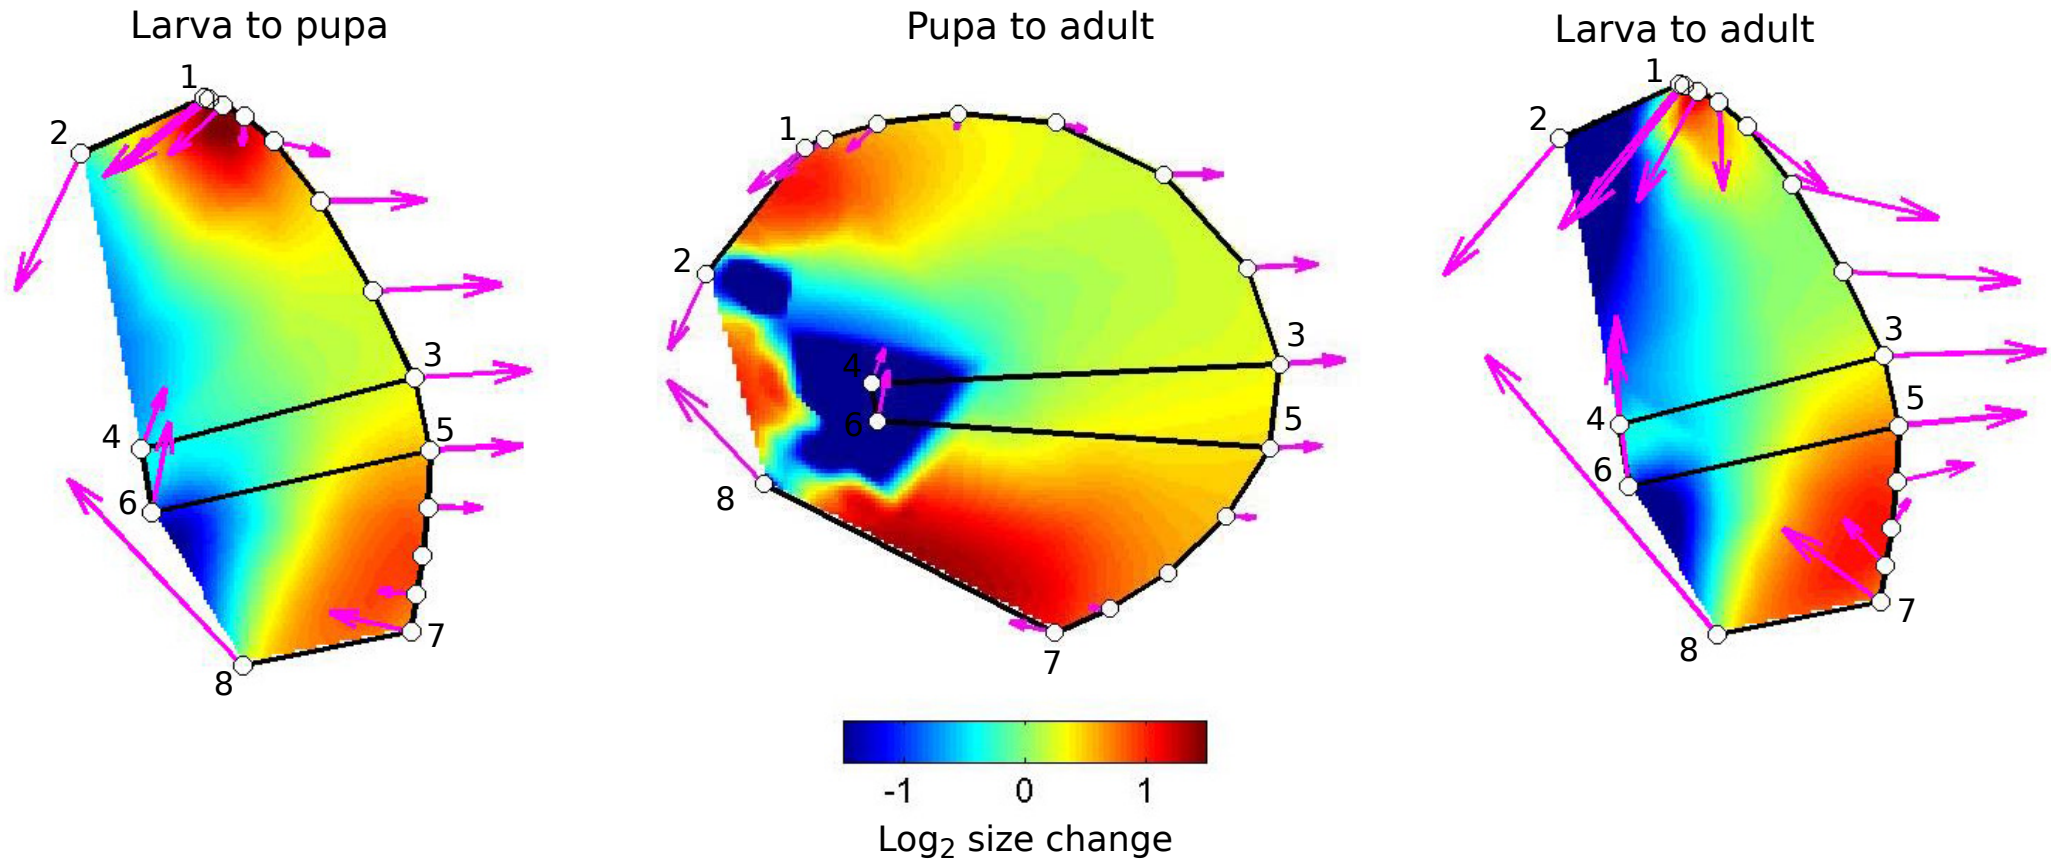



**Figure 7**

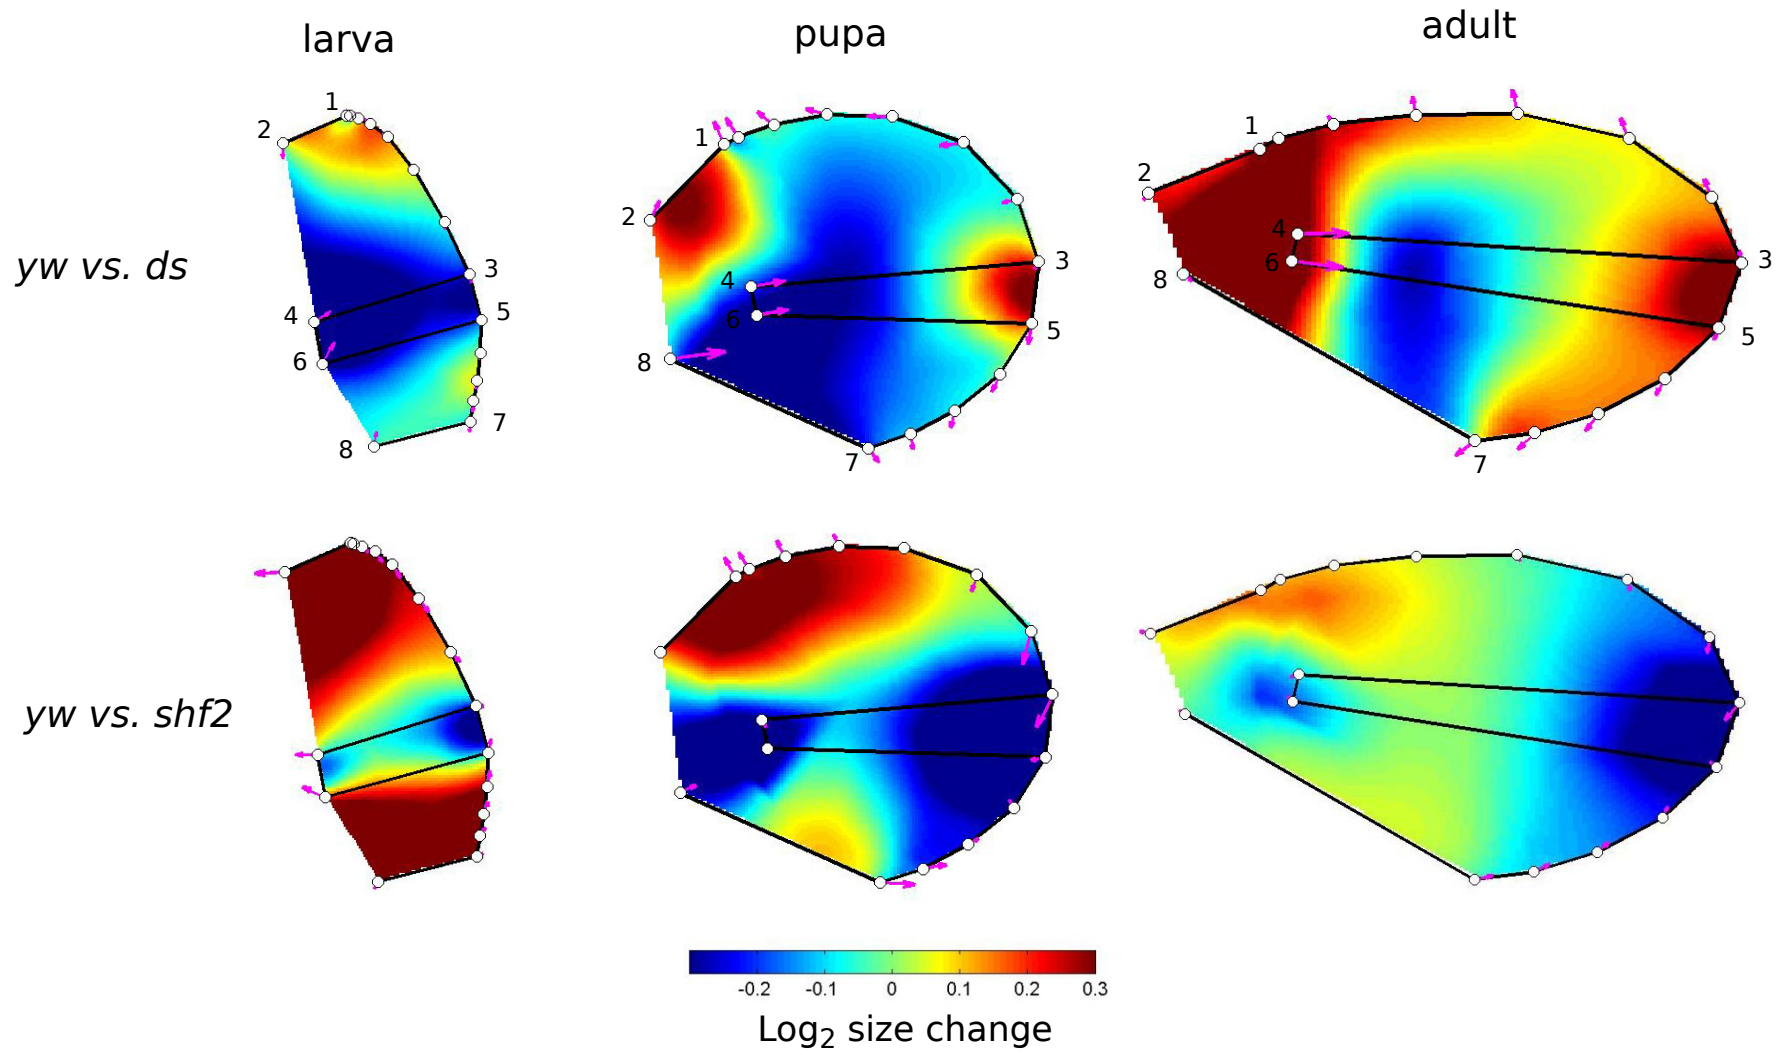

**Figure 8**

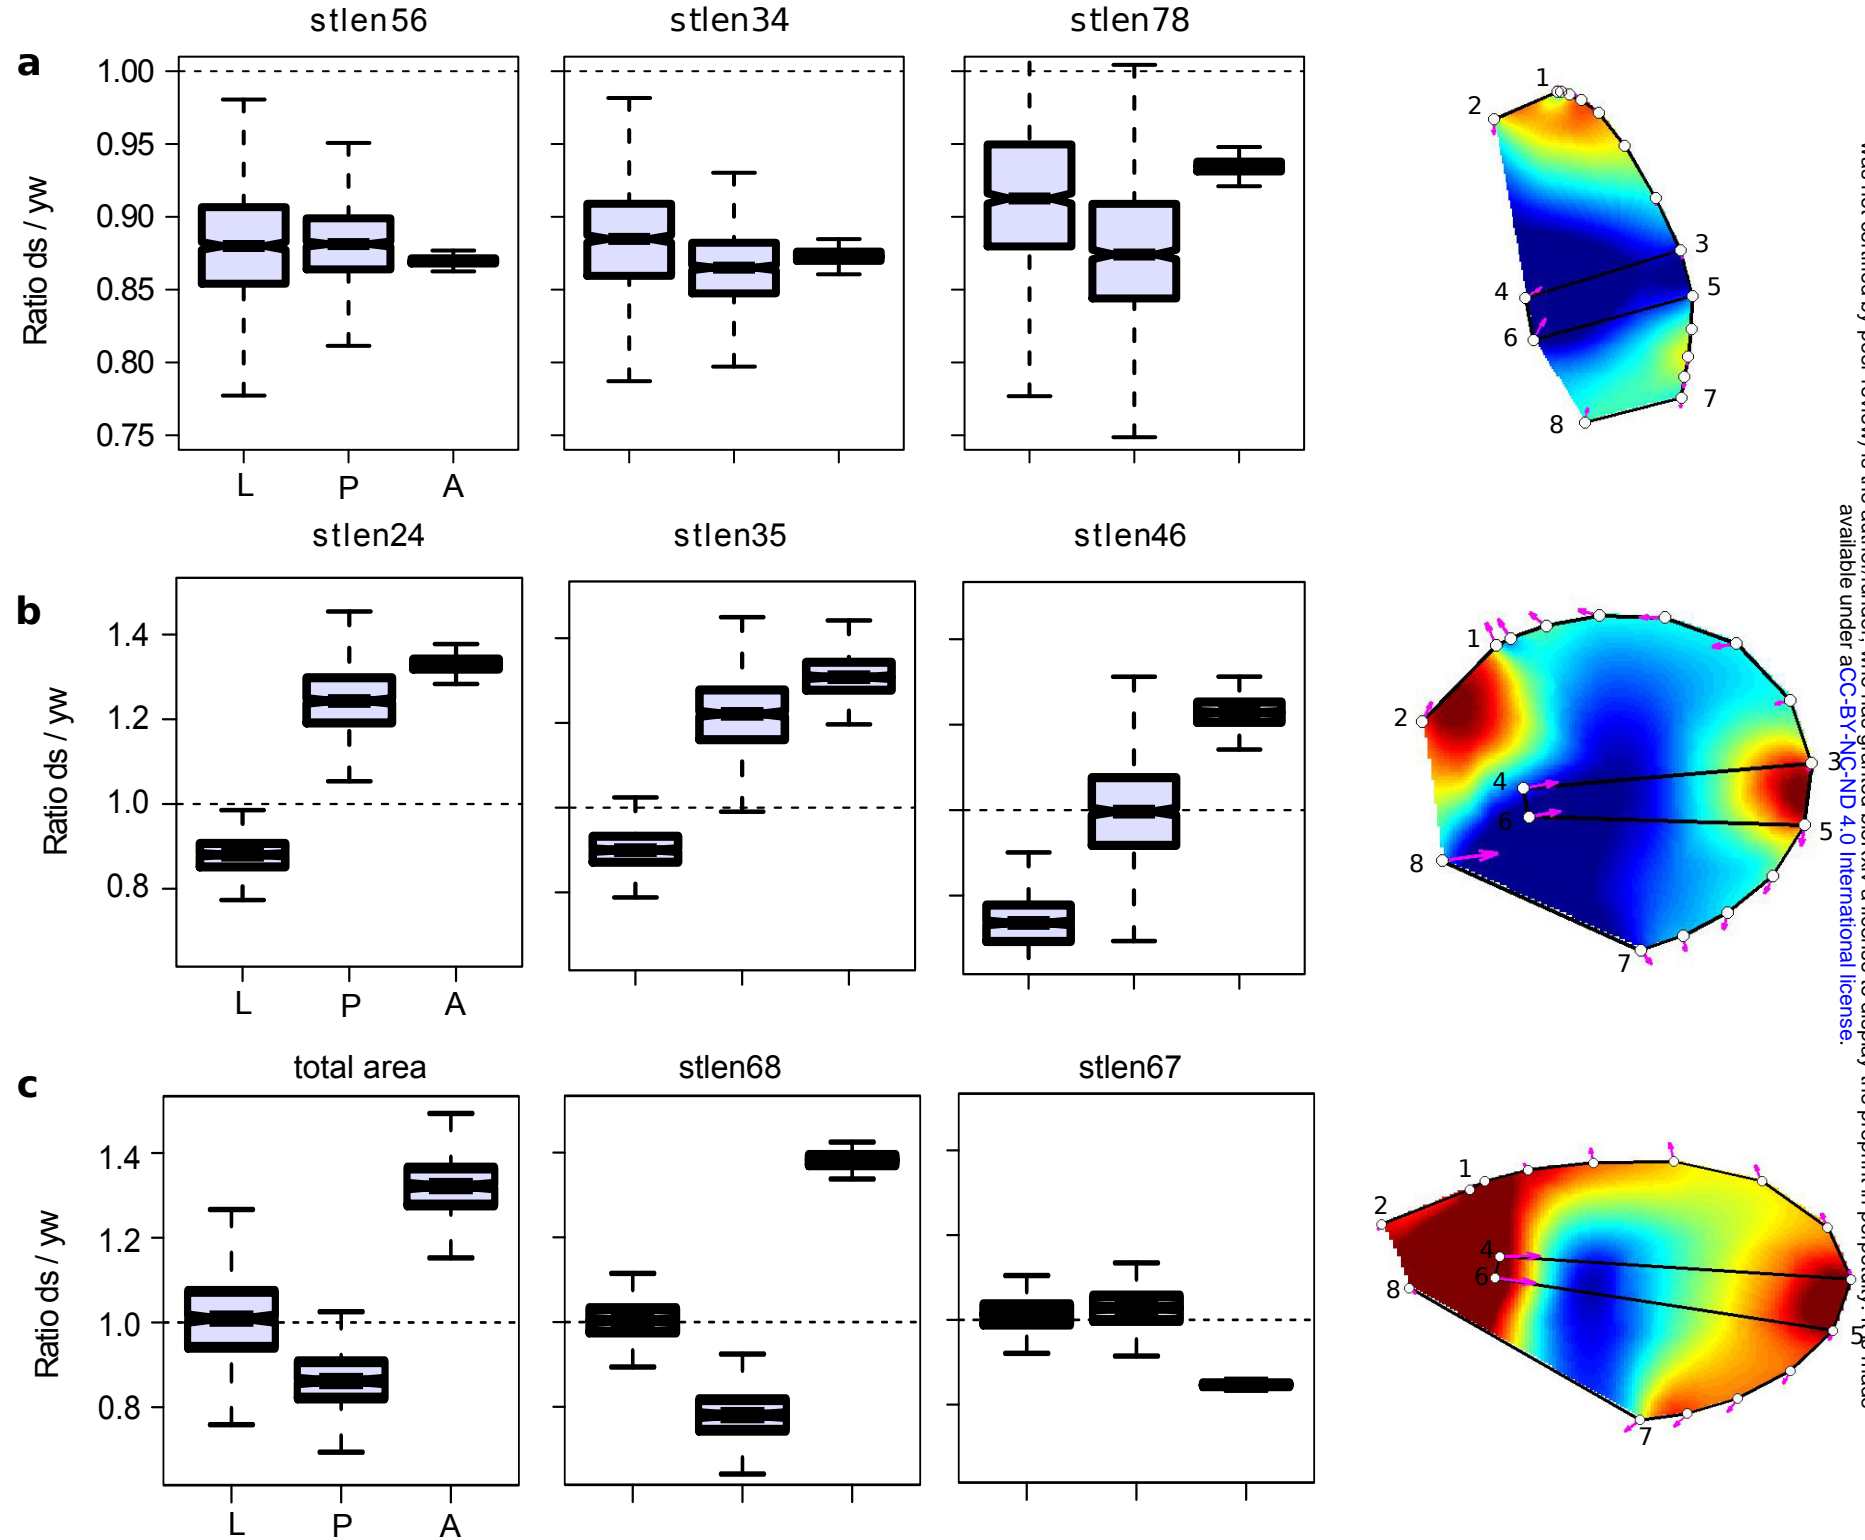

**Figure 9**

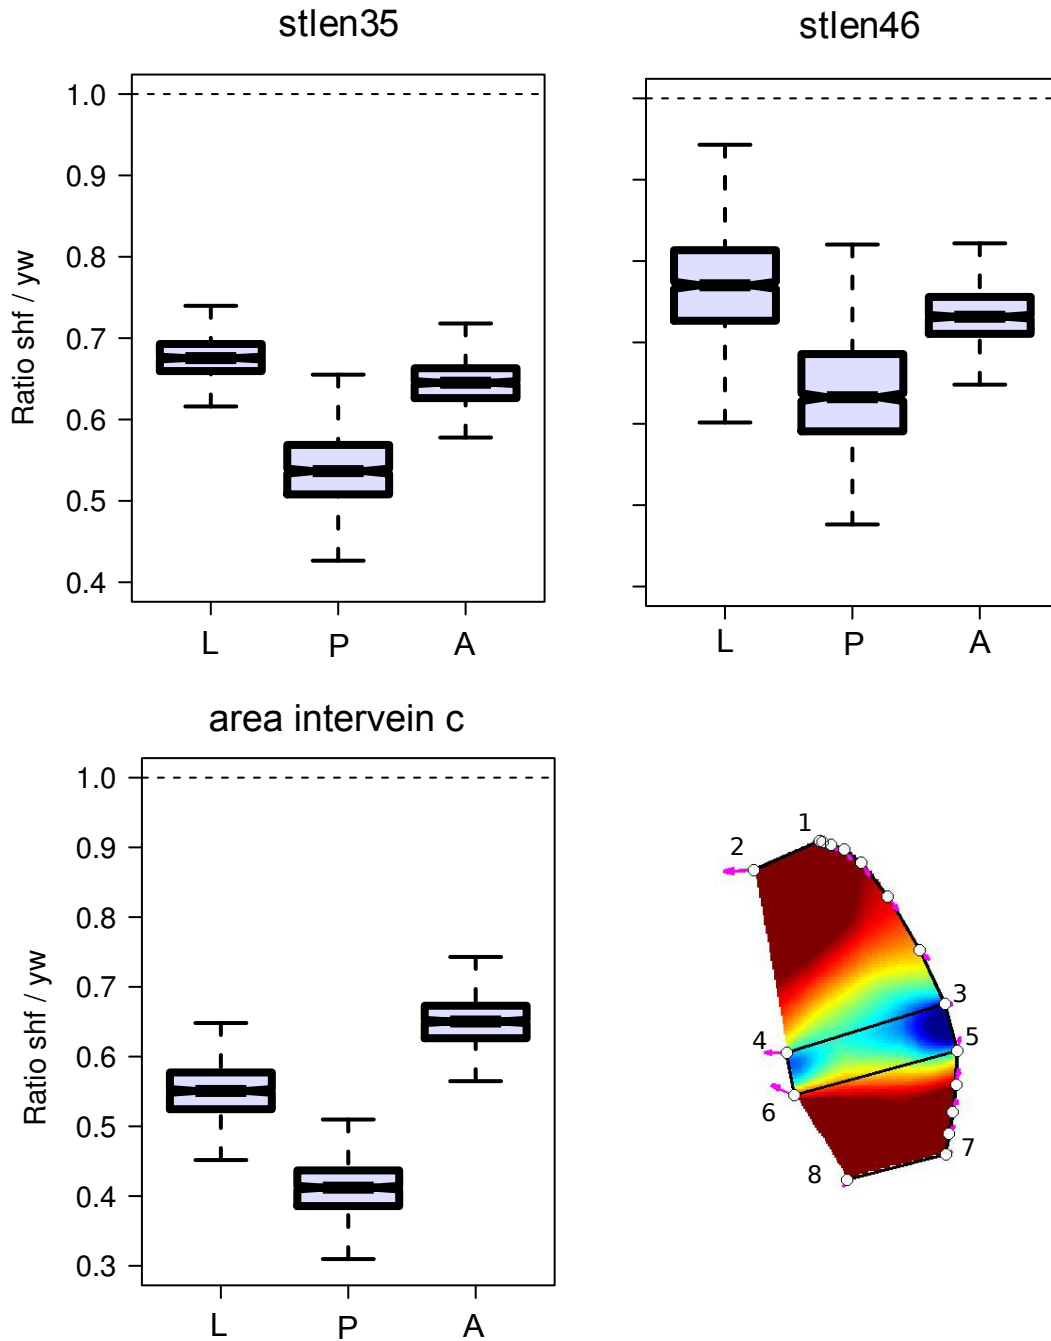



**Figure 10**

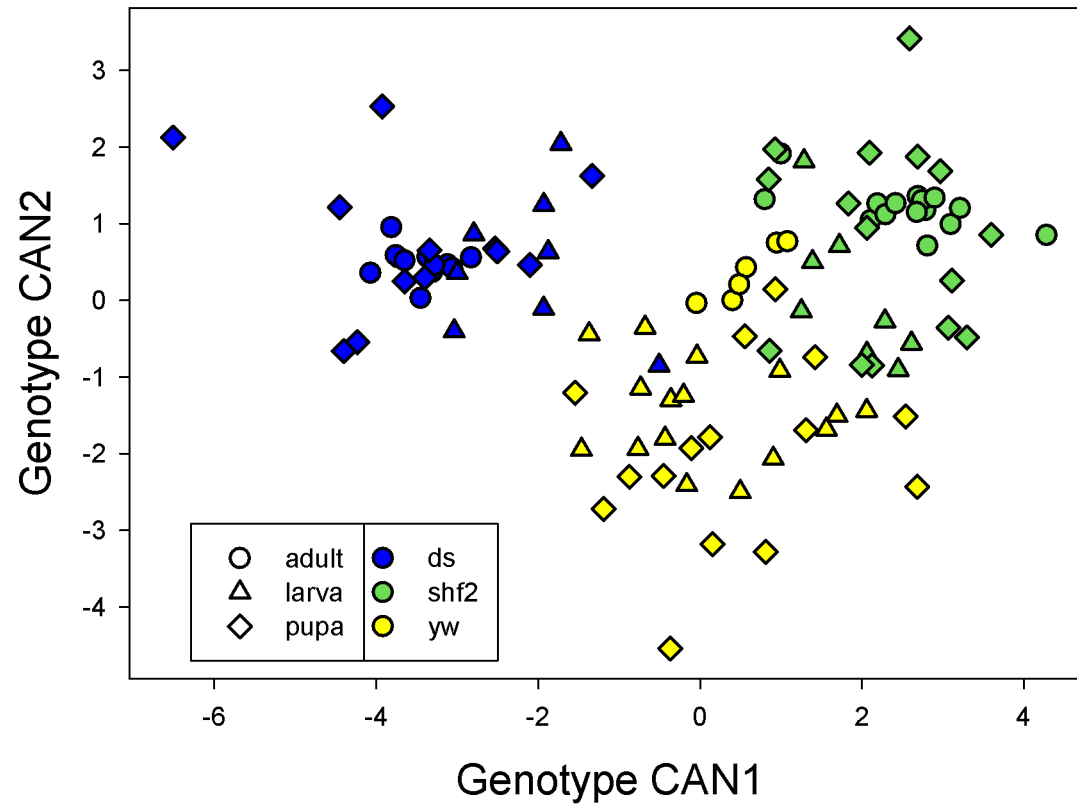

Source: http://biorxiv.org/content/10.1101/229880v1.full.pdf
